# Supplementary material
Source: Springer Nature journal article supplement (https://www.springermedizin.de/resource/supplementary/12916_2013_1090_MOESM3_ESM.pdf/9598400)
Supplement: MOESM3 [file 9598400]

**Table 1. Profile of HAM/TSP patients enrolled and improvement of motor function in the lower extremities and urinary function 12 weeks after treatment**

| Case No. | Age (years) | Sex    | Duration of illness (years) | Concomitant therapy |                                             |            | Intermittent self-catheterization | OMDS*            |                 | Spasticity of the lower extremities |               |
|----------|-------------|--------|-----------------------------|---------------------|---------------------------------------------|------------|-----------------------------------|------------------|-----------------|-------------------------------------|---------------|
|          |             |        |                             | immunomodulator     | drug for neurogenic bladder anticholinergic | α1 blocker |                                   | before treatment | after treatment | before treatment                    | improvement** |
| 1        | 80          | Female | 23                          | No                  | Yes                                         |            | Yes                               | 6                | 6               | Yes                                 | Yes           |
| 2        | 64          | Female | 16                          | No                  | Yes                                         |            | Yes                               | 6                | 6               | Yes                                 | Yes           |
| 3        | 57          | Male   | 51                          | PSL/ IFN-α          | Yes                                         |            | Yes                               | 6                | 6               | Yes                                 | Yes           |
| 4        | 51          | Female | 36                          | No                  | Yes                                         |            | Yes                               | 9                | 9               | Yes                                 | Yes           |
| 5        | 67          | Female | 3                           | No                  |                                             |            | Yes                               | 3                | 3               | No                                  |               |
| 6        | 61          | Female | 30                          | No                  |                                             |            | Yes                               | 5                | 5               | Yes                                 | Yes           |
| 7        | 68          | Female | 12                          | No                  |                                             | Yes        | No                                | 4                | 4               | Yes                                 | Yes           |
| 8        | 64          | Male   | 11                          | PSL                 |                                             | Yes        | No                                | 5                | 5               | Yes                                 | No            |
| 9        | 66          | Male   | 23                          | PSL                 | Yes                                         |            | Yes                               | 9                | 9               | Yes                                 | Yes           |
| 10       | 76          | Male   | 23                          | No                  |                                             |            | No                                | 6                | 6               | Yes                                 | Yes           |
| 11       | 53          | Female | 7                           | No                  |                                             |            | Yes                               | 6                | 6               | Yes                                 | No            |
| 12       | 62          | Female | 12                          | PSL                 |                                             | Yes        | Yes                               | 4                | 4               | No                                  |               |
| 13       | 44          | Female | 22                          | No                  |                                             |            | Yes                               | 6                | 6               | Yes                                 | No            |
| 14       | 56          | Male   | 10                          | No                  | Yes                                         |            | Yes                               | 5                | 5               | Yes                                 | Yes           |
| 15       | 71          | Female | 45                          | No                  | Yes                                         |            | Yes                               | 9                | 9               | No                                  |               |
| 16       | 78          | Female | 18                          | No                  | Yes                                         |            | Yes                               | 5                | 5               | Yes                                 | Yes           |
| 17       | 50          | Female | 19                          | No                  |                                             |            | No                                | 5                | 5               | Yes                                 | Yes           |
| 18       | 63          | Female | 29                          | No                  | Yes                                         |            | Yes                               | 8                | 8               | Yes                                 | Yes           |
| 19       | 62          | Female | 9                           | PSL                 | Yes                                         |            | Yes                               | 8                | 8               | Yes                                 | No            |
| 20       | 60          | Female | 34                          | No                  | Yes                                         |            | Yes                               | 2                | 1               | No                                  |               |
| 21       | 46          | Female | 26                          | PSL                 |                                             | Yes        | No                                | 2                | 1               | Yes                                 | Yes           |
| 22       | 31          | Female | 7                           | No                  |                                             | Yes        | No                                | 4                | 3               | Yes                                 | Yes           |
| 23       | 56          | Male   | 18                          | No                  |                                             |            | Yes                               | 10               | 10              | No                                  |               |
| 24       | 56          | Male   | 16                          | IFN-α               |                                             |            | No                                | 2                | 2               | Yes                                 | Yes           |
| Remarks  | mean ± SD;  |        | mean ± SD;                  |                     |                                             |            |                                   |                  |                 | % improvement:                      |               |
|          | 60.1 ± 11.2 |        | 20.9 ± 12.1                 |                     |                                             |            |                                   |                  |                 | 78.9 (P=0.0003)***                  |               |

**Table 1. (continued)**

| Case No.       | Time required to walk 10 m (sec) |                 |               | downstairs (sec) |                 |               | Detrusor overactivity |                 | Detrusor-sphincter dyssynergia |                 |
|----------------|----------------------------------|-----------------|---------------|------------------|-----------------|---------------|-----------------------|-----------------|--------------------------------|-----------------|
|                | before treatment                 | after treatment | % improvement | before treatment | after treatment | % improvement | before treatment      | after treatment | before treatment               | after treatment |
| 1              | 26.5                             | 21.6            | 18.5          |                  | N.E.            |               | No                    | No              | No                             | No              |
| 2              | 15.5                             | 9.8             | 36.8          |                  | N.E.            |               | Yes                   | No              | No                             | No              |
| 3              | 11.5                             | 10.5            | 8.7           | 8.6              | 7.7             | 10.5          | Yes                   | No              | Yes                            | Yes             |
| 4              |                                  | N.E.            |               |                  | N.E.            |               | Yes                   | No              | Yes                            | Yes             |
| 5              | 5.3                              | 4.9             | 7.5           | 3.8              | 3.7             | 2.6           | No                    | No              | Yes                            | No              |
| 6              | 5.9                              | 6.2             | -5.1          | 4.1              | 4.2             | -2.4          | No                    | No              | Yes                            | No              |
| 7              | 8.9                              | 9.5             | -6.7          | 9.2              | 7.9             | 14.1          | No                    | No              | No                             | No              |
| 8              | 12.6                             | 13.3            | -5.6          | 9.5              | 8.6             | 9.5           | Yes                   | No              | Yes                            | Yes             |
| 9              |                                  | N.E.            |               |                  | N.E.            |               | Yes                   | No              | No                             | No              |
| 10             | 20                               | 25.1            | -25.5         |                  | N.E.            |               | No                    | No              | No                             | No              |
| 11             | 29.5                             | 32.5            | -10.2         |                  | N.E.            |               | Yes                   | No              | Yes                            | Yes             |
| 12             | 6.6                              | 6.9             | -4.5          | 4.4              | 4.3             | 2.3           | Yes                   | No              | Yes                            | No              |
| 13             | 22.8                             | 21.3            | 6.6           |                  | N.E.            |               | Yes                   | No              | No                             | No              |
| 14             | 15.4                             | 11.3            | 26.6          | 14.3             | 11.4            | 20.3          | No                    | No              | No                             | No              |
| 15             |                                  | N.E.            |               |                  | N.E.            |               | Yes                   | No              | No                             | No              |
| 16             | 13.7                             | 20.9            | -52.6         |                  | N.E.            |               | Yes                   | Yes             | Yes                            | Yes             |
| 17             | 13.3                             | 11.5            | 13.5          | 10.0             | 7.3             | 27            | Yes                   | Yes             | No                             | No              |
| 18             |                                  | N.E.            |               |                  | N.E.            |               | Yes                   | Yes             | No                             | No              |
| 19             |                                  | N.E.            |               |                  | N.E.            |               | Yes                   | Yes             | Yes                            | No              |
| 20             | 6.9                              | 5.7             | 17.4          | 4.5              | 3.5             | 22.2          | No                    | No              | No                             | No              |
| 21             | 5.7                              | 4.1             | 28.1          | 3.6              | 3.5             | 2.8           | Yes                   | No              | No                             | No              |
| 22             | 10.3                             | 6.8             | 34            | 9.4              | 4.4             | 53.2          | Yes                   | Yes             | Yes                            | Yes             |
| 23             |                                  | N.E.            |               |                  | N.E.            |               | No                    | No              | Yes                            | No              |
| 24             | 4.5                              | 4.3             | 4.4           | 3.2              | 3.4             | -6.3          | Yes                   | No              | No                             | No              |
| <b>Remarks</b> |                                  |                 |               |                  |                 |               | <b>% improvement:</b> |                 | <b>% improvement:</b>          |                 |
|                |                                  |                 |               |                  |                 |               | 58.8 (P=0.0094)***    |                 | 45.5 (P=0.0736)***             |                 |

\*OMDS; Osame's motor function score was rated from 0 to 13 according to the disability grade [13]. \*\*Improvement in spasticity of more than one grade according to the modified Ashworth scale [14]. \*\*\*Statistical significance was determined by the McNemar test. N.E.; not evaluated because of high OMDS. PSL: prednisolone. IFN- $\alpha$ : interferon-alpha.
